# Supplementary material for: Identification of Key Tissue-Specific, Biological Processes by Integrating Enhancer Information in Maize Gene Regulatory Networks
Source: Front Genet. 2021 Jan 11;11:606285. doi: 10.3389/fgene.2020.606285 (PMC7834273; doi:10.3389/fgene.2020.606285)
Supplement: Supplementary file 1 [file Table_1.XLSX]

## Sheet: Table S1
Organ group	Tissue description	Growth stage at collection	Growth method	Tissue designation	Genotype	Seedlot	Data origin	Epigenomic data for enhancer discovery	mRNA-seq data	No. of plants per mRNA-seq replicate
Root	Pooled roots (from emerging point to root tip)	4 DAS	Perlite, without direct light	DAS4_R	B73	B73_INRA_SMH2014	This article	no	yes	3
Leaf	Hypocotyl (from emerging point to 5 mm above meristematic ring)	4 DAS	Perlite, without direct light	DAS4_HY	B73	B73_INRA_SMH2014	This article	no	yes	3
	Pooled immature leaf parts (white parts of leaf 3 and onwards)	V2	Greenhouse	V2-IST	B73	PI 0550473, lot 94ncai02	Oka et al., 2017	yes	yes	3
	Pooled immature leaf parts (white parts of leaf 3 and onwards)	V2	Greenhouse	V2_LF-I	B73	B73_INRA_SMH2014	This article	no	yes	1
	Pooled leaf blades (green expanded parts of leaves 1 to 4)	V2	Greenhouse	V2_LF	B73	B73_INRA_SMH2014	This article	no	yes	1
	Leaf blade without midrib of last ligulated leaf	Pollen shed	Greenhouse	PS_LF	B73	B73_INRA_SMH2014	This article	no	yes	1
Internode	First internode below ear (1/3rd of internode immediately above node)	Pollen shed	Greenhouse	PS_IN1	B73	B73_INRA_SMH2014	This article	no	yes	1
Reproductive	Pooled soft inner husk leaves surrounding the ear (tough outer leaves removed)	Silk emergence	Greenhouse	Husk	B73	PI 0550473, lot 94ncai02	Oka et al., 2017	yes	yes	3
	Pooled silks, growing parts under husk	Pollen shed	Greenhouse	PS_SILK	B73	B73_INRA_SMH2014	This article	no	yes	1
	Tassel, pool of parts harboring fresh pollen	Pollen shed	Greenhouse	PS_TAS	B73	B73_INRA_SMH2014	This article	no	yes	1
	Pre-pollination ear, middle part (1/3rd top part and 1/5th bottom part removed)	Pollen shed	Greenhouse	PS_EAR	B73	B73_INRA_SMH2014	This article	no	yes	1
Seed	Whole seed (embryo, endosperm and pericarp), end of early development stage	12 DAP	Field (Summer 2017, South West France)	DAP12_S	B73	B73_INRA_SMH2014	This article	no	yes	1
	Whole seed (embryo, endosperm and pericarp), late filling stage	35 DAP	Field (Summer 2017, South West France)	DAP35_S	B73	B73_INRA_SMH2014	This article	no	yes	1
DAS: days after sowing; Vn: vegetative stage corresponding to the number n of ligulated (fully expanded) leaves; PS: pollen shed; DAP: days after pollination
