# Supplementary material for: Identification of Key Tissue-Specific, Biological Processes by Integrating Enhancer Information in Maize Gene Regulatory Networks
Source: Front Genet. 2021 Jan 11;11:606285. doi: 10.3389/fgene.2020.606285 (PMC7834273; doi:10.3389/fgene.2020.606285)
Supplement: Supplementary file 7 [file Table_7.XLSX]

## Sheet: Table S7 Legend
Husk module ID	Module ID in husk network as determined by ALPACA
V2 modul ID	Module ID in V2-IST network as determined by ALPACA
Jaccard Index*	Jaccard index. Only the top jaccard index of all husk x V2 pairwise comparisons is reported
Module Type	Is the module shared between the two networks (shared), specific to the husk network (Husk) or to the V2-IST network (V2-IST)
#Genes✝	Number of genes in module. For shared modules, only genes that present in both modules are counted. For tissue-specific modules, all genes are counted.
Correspondance with Fig.2	Name of module in Figure 2 and Supplementary Figure S6

## Sheet: Table S7
Husk module ID	V2 modul ID	Jaccard Index	Module Type	#Genes✝	Correspondance with Fig.2
1	1	0.974	shared	444
2	2	0.968	shared	927
3	3	0.591	shared	1269
4	4	0.906	shared	572
5	6	0.629	shared	698
6	7	0.5	shared	1196
8	10	1	shared	14
12	12	1	shared	5
13	13	0.917	shared	11
7	7	0.22	Husk	349	H.1
9	6	0.078	Husk	61	H.2
3	5	0.384	V2-IST	859	V2.1
6	8	0.398	V2-IST	811	V2.2
5	9	0.304	V2-IST	319	V2.3
